# Supplementary material
Source: Preprints.org preprint supplement (doi:10.20944/preprints201903.0178.v3)
Supplement: Supplementary file 1 [file supplementary]

**Table S1.** Nutrient constraints applied during all linear optimization procedures.

**Reference pupil – nutritional constraints for optimized food supply**

|                                                      | Lower limit | Upper limit |
|------------------------------------------------------|-------------|-------------|
| <b>Energy (kcal)<sup>a</sup></b>                     | 604         | 604         |
| <b>Carbohydrates (%E)<sup>b</sup></b>                | 45          | 60          |
| <b>Fat (%E)<sup>b</sup></b>                          | 22          | 40          |
| <b>Protein (%E)<sup>b</sup></b>                      | 10          | 20          |
| <b>Fiber (%E)<sup>c</sup></b>                        | 2           | —           |
| <b>Saturated fatty acids (%E)<sup>b</sup></b>        | —           | 10          |
| <b>Mono unsaturated fatty acids (%E)<sup>b</sup></b> | 10          | 20          |
| <b>Poly unsaturated fatty acids (%E)<sup>b</sup></b> | 5           | 10          |
| <b>Vitamin A (µg)<sup>c</sup></b>                    | 168         | —           |
| <b>Vitamin D (µg)<sup>c</sup></b>                    | 3           | 30          |
| <b>Vitamin E (mg)<sup>c</sup></b>                    | 2.2         | 90          |
| <b>Thiamine (mg)<sup>c</sup></b>                     | 0.3         | —           |
| <b>Riboflavin (mg)<sup>c</sup></b>                   | 0.4         | —           |
| <b>Vitamin C (mg)<sup>c</sup></b>                    | 15.3        | 300         |
| <b>Niacin (mg)<sup>c</sup></b>                       | 4.2         | 270         |
| <b>Vitamin B6 (mg)<sup>c</sup></b>                   | 0.4         | 7.5         |
| <b>Vitamin B12 (µg)<sup>c</sup></b>                  | 0.5         | —           |
| <b>Folate (µg)<sup>c</sup></b>                       | 57.6        | 300         |
| <b>Phosphor (mg)<sup>c</sup></b>                     | 190.8       | 900         |
| <b>Iodine (µg)<sup>c</sup></b>                       | 41.4        | 180         |
| <b>Iron (mg)<sup>c</sup></b>                         | 3.3         | 7.5         |
| <b>Calcium (mg)<sup>c</sup></b>                      | 246         | 750         |
| <b>Potassium (mg)<sup>c</sup></b>                    | 810         | —           |
| <b>Magnesium (mg)<sup>c</sup></b>                    | 76.5        | —           |
| <b>Salt (g)<sup>d</sup></b>                          | —           | 3.6         |
| <b>Selenium (µg)<sup>c</sup></b>                     | 11.7        | 90          |
| <b>Zink (mg)<sup>c</sup></b>                         | 2.7         | 7.5         |
| <b>Omega-3 fatty acids (%E)<sup>c</sup></b>          | 3.3         | —           |

<sup>a</sup>Based on 30% of daily estimated energy requirement (EER), averaged values over 10 grades (preparatory class to ninth grade) and both sexes.

<sup>b</sup>Lower and upper limits based on 30% of daily recommended intake ranges, averaged values over 10 grades (preparatory class to ninth grade) and both sexes.

<sup>c</sup>Lower limit based on 30% of daily recommended intakes (RIs) and upper limit based on 30% of daily Upper intake levels (ULs), averaged values over 10 grades (preparatory class to ninth grade) and both sexes.

<sup>d</sup>Upper limit based on 30% of daily recommended intake (RIs).

**Table S2.** Amounts, cost, RDs, and associated GHGE (CO<sub>2</sub>eq) of individual food items in observed and optimized supply, respectively, when minimizing GHGE and applying constraints on nutritional adequacy only (Model 1, GHGE<sub>min</sub>).

| Food            | School 1 (SEK 6.50 <sup>a</sup> ) |           |                                |                                        | School 2 (SEK 5.54 <sup>a</sup> ) |           |                                |                                        | School 3 (SEK 3.88 <sup>a</sup> ) |           |                                |                                        |
|-----------------|-----------------------------------|-----------|--------------------------------|----------------------------------------|-----------------------------------|-----------|--------------------------------|----------------------------------------|-----------------------------------|-----------|--------------------------------|----------------------------------------|
|                 | Amount <sup>b</sup> (g)           |           | Change <sup>c</sup><br>(RD, %) | CO <sub>2</sub> eq <sup>d</sup><br>(g) | Amount <sup>b</sup> (g)           |           | Change <sup>c</sup><br>(RD, %) | CO <sub>2</sub> eq <sup>d</sup><br>(g) | Amount <sup>b</sup>               |           | Change <sup>c</sup><br>(RD, %) | CO <sub>2</sub> eq <sup>d</sup><br>(g) |
|                 | Observed                          | Optimized |                                |                                        | Observed                          | Optimized |                                |                                        | Observed                          | Optimized |                                |                                        |
| Crisp bread     | 0.03                              | 59.39     | 209156%                        | 17.8                                   |                                   |           |                                |                                        |                                   |           |                                |                                        |
| Wheat bran      |                                   |           |                                |                                        |                                   |           |                                |                                        | 0.24                              | 4.5       | 1777%                          | 0.9                                    |
| Semolina        |                                   |           |                                |                                        | 0.86                              | 55.24     | 6323%                          | 24.3                                   | 0.55                              | 17.95     | 3193%                          | 7.9                                    |
| Potato          | 22.90                             | 133.43    | 483%                           | 13.3                                   | 5.52                              | 212.57    | 3748%                          | 21.3                                   |                                   |           |                                |                                        |
| Lentils dried   |                                   |           |                                |                                        |                                   |           |                                |                                        | 0.44                              | 3.92      | 788%                           | 1.3                                    |
| Chickpeas dried | 0.13                              | 53.19     | 40338%                         | 19.7                                   | 0.06                              | 56.54     | 87254%                         | 20.92                                  |                                   |           |                                |                                        |
| Olive oil       |                                   |           |                                |                                        |                                   |           |                                |                                        | 0.15                              | 3.61      | 2284%                          | 7.4                                    |
| Margarine 80%   | 0.53                              | 2.35      | 341%                           | 3.7                                    | 0.52                              | 0.54      | 4%                             | 0.85                                   |                                   |           |                                |                                        |
| Parsley         | 0.05                              | 42.27     | 91729%                         | 14.8                                   |                                   |           |                                |                                        |                                   |           |                                |                                        |
| Carrots         |                                   |           |                                |                                        | 1.29                              | 11.89     | 818%                           | 1.31                                   | 11.36                             | 14.94     | 32%                            | 1.6                                    |
| Lingonberries   |                                   |           |                                |                                        |                                   |           |                                |                                        | 0.38                              | 6.63      | 1652%                          | 5.7                                    |
| Anchovies       |                                   |           |                                |                                        |                                   |           |                                |                                        | 0.06                              | 48.62     | 80149%                         | 14.1                                   |
| Pickled herring | 0.063                             | 20.65     | 32602%                         | 12.8                                   | 0.08                              | 5.2       | 6249%                          | 3.2                                    | 0.04                              | 0.94      | 49943%                         | 11.7                                   |
| Breaded herring | 0.036                             | 6.61      | 18511%                         | 4.1                                    |                                   |           |                                |                                        |                                   |           |                                |                                        |
| Salt            |                                   |           |                                |                                        | 0.52                              | 0.06      | -88%                           | 0.02                                   | 0.04                              | 0.22      | 480%                           | 0.1                                    |
| <b>Total</b>    |                                   |           |                                | <b>86<br/>(10.6%)<sup>e</sup></b>      |                                   |           |                                | <b>72<br/>(7.0%)<sup>e</sup></b>       |                                   |           |                                | <b>51<br/>(5.3%)<sup>e</sup></b>       |

<sup>a</sup>Cost of food supply per reference portion after optimization.

<sup>b</sup>Absolute raw amount of individual food items in observed and optimized supply, respectively.

<sup>c</sup>Relative change from observed food supply during the school year 2015/2016 after optimization.

<sup>d</sup>Amount of carbon dioxide equivalents (CO<sub>2</sub>eq) of food supply after optimization.

<sup>e</sup>Percentage of observed GHGE

GHGE, Greenhouse gas emissions.

GHGE<sub>min</sub>, optimized for lowest achievable GHGE.

|                      |                              | GHGE Unconstrained <sup>1</sup> |                |                              | -10% GHGE |                               |                | -20% GHGE      |                               |                | -30% GHGE                     |                               |                               | -40% GHGE                      |                               |                | -50% GHGE                    |                               |                                |
|----------------------|------------------------------|---------------------------------|----------------|------------------------------|-----------|-------------------------------|----------------|----------------|-------------------------------|----------------|-------------------------------|-------------------------------|-------------------------------|--------------------------------|-------------------------------|----------------|------------------------------|-------------------------------|--------------------------------|
|                      |                              | RD                              |                |                              | RD        |                               |                | RD             |                               |                | RD                            |                               |                               | RD                             |                               |                | RD                           |                               |                                |
|                      |                              | School 1                        | School 2       | School 3                     | School 1  | School 2                      | School 3       | School 1       | School 2                      | School 3       | School 1                      | School 2                      | School 3                      | School 1                       | School 2                      | School 3       | School 1                     | School 2                      | School 3                       |
| Main food category   | Food subcategory             |                                 |                |                              |           |                               |                |                |                               |                |                               |                               |                               |                                |                               |                |                              |                               |                                |
| Eggs                 | Eggs, raw/prepared           |                                 | 3 items, -100% | 2 items, -100%               |           | 3 items, -100%                | 2 items, -100% |                | 3 items, -100%                | 2 items, -100% |                               | 3 items, -100%                | 2 items, -100%                |                                | 3 items, -100%                | 2 items, -100% |                              | 3 items, -100%                | 2 items, -100%                 |
| Drinks (w/o) milk    | Juice and nectar             |                                 |                |                              |           |                               |                |                |                               |                |                               |                               |                               | -6%                            |                               |                | -100%                        |                               |                                |
| Fats and oils        | Butter                       | -100%                           |                | 1 item, -63%<br>1 item, -17% | -100%     |                               | -100%          | -100%          |                               | -82%           | -100%                         |                               | -50%                          | -100%                          |                               | -11%           | -100%                        |                               | 1 item, -100%<br>1 item, +143% |
|                      | Margarine                    | -100%                           | -67%           |                              | -86%      | -36%                          |                | -23%           | -34%                          |                | +15%                          |                               |                               | +114%                          | +63%                          |                | +110%                        | +136%                         |                                |
|                      | Rapeseed oil                 |                                 | +33%           | -100%                        |           |                               | -100%          |                |                               | -100%          |                               |                               | -100%                         |                                |                               | -98%           |                              |                               | -100%                          |
| Seafood              | Salmon                       |                                 |                |                              |           |                               |                |                |                               |                |                               |                               |                               |                                |                               |                |                              |                               | +128%                          |
|                      | White fish                   |                                 |                |                              |           |                               |                |                |                               |                |                               |                               |                               |                                |                               |                | +95%                         |                               | -53%                           |
| Fruits and berries   | Berries                      |                                 |                |                              |           |                               |                |                |                               |                |                               |                               |                               |                                |                               |                |                              |                               | +171%                          |
| Vegetables and roots | Legumes                      |                                 |                | +321%                        |           |                               | +380%          |                |                               | +429%          |                               |                               | +475%                         |                                |                               | +496%          |                              |                               | +468%                          |
|                      | Potatoes and roots           | +112%                           | +45%           |                              | +124%     | +128%                         |                | +168%          | +159%                         |                | +221%                         | +192%                         |                               |                                | +289%                         |                |                              | +84%                          |                                |
|                      | Tomatoes, cucumbers, peppers |                                 |                |                              |           |                               |                |                |                               |                |                               |                               |                               |                                |                               |                | -100%                        |                               |                                |
| Meat                 | Beef                         |                                 |                |                              |           |                               |                |                |                               |                | 1 item, -100%<br>1 item, -37% |                               |                               | -100%                          | 2 items, -100%                | -100%          | -100%                        | 2 items, -100%                | 2 items, -100%                 |
|                      | Meat balls/patties           |                                 |                |                              | -100%     |                               |                | 2 items, -100% | -79%                          |                | 4 items, -100%                | -100%                         | -100%                         | 4 items, -100%<br>1 item, -91% | -100%                         | 2 items, -100% | 8 items, -100%               | 2 items, -100%                | 2 items, -100%                 |
|                      | Meat dish                    |                                 |                |                              |           |                               |                |                |                               |                |                               |                               |                               |                                |                               |                | -100%                        |                               |                                |
|                      | Minced meat                  |                                 |                |                              |           | -60%                          | -52%           |                | -100%                         | -94%           |                               | -100%                         | 1 item, -100%<br>1 item, -71% |                                | -100%                         | 2 items, -100% |                              | 2 items, -100%                | 2 items, -100%                 |
|                      | Offal                        | +112%                           | +767%          |                              | +171%     | +830%                         |                | +182%          | +916%                         |                | +202%                         | +970%                         |                               | +137%                          | +1021%                        |                | +89%                         | +867%                         |                                |
|                      | Pork                         |                                 |                |                              |           |                               |                |                |                               |                |                               |                               |                               |                                |                               |                | 3 items, -100%               | -100%                         | -100%                          |
|                      | Poultry                      |                                 |                |                              |           |                               |                |                |                               |                |                               |                               |                               | -11%                           | -44%                          |                | 1 item, -100%<br>1 item, -1% | -100%                         |                                |
|                      | Sausages                     | -100%                           |                |                              | -99%      |                               |                | -100%          |                               |                | 2 items, -100%                |                               |                               | 2 items, -100%                 | -100%                         | -75%           | 3 items, -100%               | 1 item, -100%<br>1 item, -44% | 2 items, -100%                 |
|                      | Vegetable dish with meat     |                                 |                |                              |           |                               |                |                |                               |                |                               |                               |                               | -100%                          |                               |                | 2 items, -100%               |                               |                                |
| Seasoning and sauces | Mayonnaise/dressing          |                                 |                | -29%                         |           |                               | -10%           |                |                               | -5%            |                               |                               | -1%                           |                                |                               |                | -50%                         |                               | -23%                           |
|                      | Salt                         | -29%                            |                | -20%                         | -29%      |                               | -17%           | -27%           |                               | -16%           | -18%                          |                               | -13%                          |                                |                               | -17%           |                              |                               |                                |
| Dairy                | Cheese                       | -11%                            | 2 items, -100% | -100%                        |           | 2 items, -100%                | -100%          | -96%           | 2 items, -100%                | -100%          | -100%                         | 2 items, -100%                | -100%                         | 1 item, -100%<br>1 item, -62%  | 2 items, -100%                | -100%          | 5 items, -100%               | 3 items, -100%                | -100%                          |
|                      | Cream                        | -100%                           | 2 items, -100% | -100%                        | -100%     | 1 item, -100%<br>1 item, -94% | -100%          | -100%          | 1 item, -100%<br>1 item, -31% | -100%          | -84%                          | 1 item, -100%<br>1 item, -75% | -100%                         | 2 items, -100%                 | 1 item, -100%<br>1 item, -95% | -100%          | 3 items, -100%               | 2 items, -100%                | 2 items, -100%                 |
|                      | Milk                         | +51%                            | +74%           | +289%                        | +45%      | +56%                          | +250%          | -15%           | +55%                          | +247%          | -3%                           | +35%                          | +248%                         | -40%                           |                               | +242%          | -33%                         | 1 item, -100%<br>1 item, -1%  | +140%                          |
| Nuts and seeds       |                              |                                 |                |                              |           |                               |                |                |                               |                |                               |                               |                               |                                |                               |                |                              |                               |                                |
| Sugar and sweets     |                              |                                 |                |                              |           |                               |                |                |                               |                |                               |                               |                               |                                |                               |                |                              |                               |                                |
| Cereals              | Bread                        |                                 |                |                              |           |                               |                |                |                               |                |                               |                               |                               | +500%                          |                               |                | +810%                        | +529%                         |                                |
|                      | Rice                         |                                 |                | -100%                        |           |                               | -100%          |                |                               | -100%          |                               |                               | -100%                         |                                |                               | -100%          |                              |                               | -100%                          |
|                      | Flour or starch              |                                 |                |                              |           |                               |                |                |                               |                |                               |                               |                               |                                |                               | -43%           |                              |                               |                                |

**Figure S1.** Summary of the RD for individual food items when minimizing TRD while applying constraints on nutritional adequacy and relative GHGE reductions (Model 2, TRD<sub>min</sub>). <sup>1</sup>No constraint on maximum allowed amount of greenhouse gas emissions per meal; GHGE, Greenhouse gas emissions; RD, Relative deviation of individual food items from observed food supply after optimization, according to main food categories and food subcategories; TRD, Total relative deviation; TRD<sub>min</sub>, optimized for minimum total relative deviation with unconstrained RD individual foods.

| GHGE Unconstrained <sup>1</sup> |                              |               |                |                | -10% GHGE     |               |                | -20% GHGE      |               |                | -30% GHGE      |                |               | -40% GHGE      |                |                |                |               |                |               |              |
|---------------------------------|------------------------------|---------------|----------------|----------------|---------------|---------------|----------------|----------------|---------------|----------------|----------------|----------------|---------------|----------------|----------------|----------------|----------------|---------------|----------------|---------------|--------------|
| RD                              |                              |               |                |                | RD            |               |                | RD             |               |                | RD             |                |               | RD             |                |                |                |               |                |               |              |
|                                 |                              | School 1      | School 2       | School 3       | School 1      | School 2      | School 3       | School 1       | School 2      | School 3       | School 1       | School 2       | School 3      | School 1       | School 2       | School 3       |                |               |                |               |              |
| Main food category              | Food subcategory             |               |                |                |               |               |                |                |               |                |                |                |               |                |                |                |                |               |                |               |              |
| Eggs                            | Eggs, raw/prepared           |               | 3 items, +200% | 2 items, +200% |               |               | 3 items, +200% | 2 items, +200% |               |                | 3 items, +200% | 2 items, +200% |               | +75%           | 3 items, +200% | 2 items, +200% |                |               |                |               |              |
| Drinks (w/o) milk               | Juice and nectar             |               |                |                |               |               |                |                |               |                |                |                |               |                | 3 items, -75%  |                |                |               |                |               |              |
| Fats and oils                   | Butter                       | -75%          |                | -75%           | -75%          |               | 1 item, -75%   | 1 item, -16%   | -75%          |                | 1 item, -75%   | 1 item, +20%   | -75%          |                | 1 item, -75%   | 1 item, +21%   | -75%           |               | 1 item, -75%   | 1 item, +85%  |              |
|                                 | Margarine                    | -75%          | -36%           |                | -75%          |               |                |                | -37%          | +24%           |                |                | +49%          | +27%           |                | +103%          | +120%          |               |                |               |              |
|                                 | Rapeseed oil                 |               |                | 1 item, -75%   | 1 item, -51%  |               | -48%           | 1 item, -75%   | 1 item, -56%  |                | -75%           | 1 item, -75%   | 1 item, -51%  |                | -75%           | 1 item, -52%   | 1 item, -52%   | -8%           | -75%           | 1 item, -75%  | 1 item, -60% |
| Seafood                         | Salmon                       |               |                | +200%          |               |               | +200%          |                |               | +200%          |                |                |               |                | +199%          |                |                |               |                | +200%         |              |
|                                 | White fish                   |               |                |                |               |               |                |                |               |                |                |                |               |                | -17%           |                |                |               | -75%           |               |              |
| Fruits and berries              | Berries                      |               |                |                |               |               |                |                |               |                |                |                |               |                | +64%           |                |                |               |                | +174%         |              |
|                                 | Exotic fruits                |               |                |                |               |               |                |                |               |                |                |                |               |                |                | -75%           |                |               |                |               |              |
| Vegetables and roots            | Legumes                      |               | +200%          | 1 item, +200%  |               | 1 item, +200% | 1 item, +200%  |                | 1 item, +200% | 2 items, +200% |                | 2 items, +200% | 1 item, +190% | 2 items, +200% |                |                | 3 items, +200% | 1 item, +190% | 2 items, +200% |               |              |
|                                 | Potatoes and roots           | +119%         |                | 1 item, +168%  |               | +140%         | 1 item, +85%   | 1 item, +123%  |               | +182%          | 1 item, +114%  |                |               | +200%          |                |                | +103%          | +61%          |                |               |              |
|                                 | Tomatoes, cucumbers, peppers |               |                |                |               |               |                |                |               |                |                |                |               |                |                |                | -75%           |               |                |               |              |
|                                 | Tomatoes, processed          |               |                |                |               |               |                |                |               |                |                |                |               |                |                |                |                |               |                | -75%          |              |
| Meat                            | Beef                         |               |                |                |               |               |                |                |               |                |                |                |               |                | 2 items, -75%  | -75%           | -75%           | 2 items, -75% | 3 items, -75%  | 3 items, -75% |              |
|                                 | Lamb                         |               |                |                |               |               |                |                |               |                |                |                |               |                |                |                |                |               |                | -75%          |              |
|                                 | Meat balls/patties           |               |                |                | 1 item, -75%  | -62%          |                |                | 3 item, -75%  | -75%           | -50%           | 5 item, -75%   | -75%          | 2 items, -75%  |                |                | 8 items, -75%  | 3 items, -75% | 3 items, -75%  | 3 items, -75% |              |
|                                 | Meat dish                    |               |                |                | 1 item, -34%  |               |                |                | 1 item, -12%  |                |                |                |               |                |                |                | -75%           |               |                |               |              |
|                                 | Minced meat                  |               | +79%           | -46%           |               |               |                |                |               | -60%           | -75%           |                | -75%          | 2 items, -75%  |                |                |                | 2 items, -75% | 2 items, -75%  | 2 items, -75% |              |
|                                 | Offal                        | +159%         | +200%          |                |               | +170%         | +200%          |                |               | +187%          | +200%          |                |               | +192%          | +200%          |                |                | +111%         | +200%          |               |              |
|                                 | Pork                         |               |                |                |               |               |                |                |               |                |                |                |               |                |                |                | 2 items, -75%  | 1 item, -75%  | 1 item, -25%   | -75%          |              |
|                                 | Poultry                      |               | -2%            |                |               |               |                |                |               | -47%           |                |                | -75%          | -75%           |                |                | 2 items, -75%  | -75%          |                |               |              |
|                                 | Sausages                     | -75%          | 1 item, -75%   | 1 item, +87%   | -75%          | -75%          | -75%           | -75%           | 2 items, -75% | -75%           | -75%           | 2 items, -75%  | -75%          | -75%           |                |                | 3 items, -75%  | 2 items, -75% | 1 item, -73%   | 3 items, -75% | 1 item, -71% |
|                                 | Vegetable dish with meat     |               |                |                |               |               |                |                |               |                | -75%           |                |               |                |                | 2 items, -75%  |                |               |                |               |              |
| Seasoning and sauces            | Mayonnaise/dressing          |               |                | -75%           |               |               | -75%           |                |               | -75%           |                |                | -75%          |                |                |                | -75%           |               |                | -75%          |              |
|                                 | Salt                         | -33%          |                | -16%           | -28%          |               | -18%           |                | -23%          |                | -15%           |                | -20%          |                | -9%            |                |                |               |                |               |              |
|                                 | Ketchup, mustard             |               | +200%          |                |               | +200%         |                |                |               | +200%          |                |                | +200%         |                |                |                | -75%           | +200%         |                |               |              |
| Dairy                           | Cheese                       | 2 items, -75% | 4 items, -75%  | -75%           | 1 item, -75%  | 3 items, -75% | -75%           | 2 items, -75%  | 3 items, -75% | -75%           | 4 items, -75%  | 3 items, -75%  | -75%          |                | 6 items, -75%  | 4 items, -75%  | 2 items, -75%  |               |                |               |              |
|                                 | Cream                        | 3 items, -75% | 3 items, -75%  | 1 item, -75%   | 2 items, -75% | 3 items, -75% | 2 items, -75%  | 2 items, -75%  | 2 items, -75% | 2 items, -75%  | 3 items, -75%  | 2 items, -75%  | -75%          |                | 3 items, -75%  | 3 items, -75%  | 2 items, -75%  |               |                |               |              |
|                                 | Milk                         | +39%          | 1 item, -75%   | 1 item, +200%  | +39%          | +37%          | 1 item, +200%  | +21%           | +25%          | +3%            | 1 item, -56%   | +25%           | +200%         |                | -35%           |                |                |               | +168%          |               |              |
|                                 | Yoghurt and sour milk        |               | -75%           | 1 item, +68%   |               | -75%          | 1 item, +119%  |                | -75%          |                |                | -61%           |               |                |                |                | -75%           | -75%          |                |               |              |
| Nuts and seeds                  | Nut or seed product          | -34%          |                |                |               |               |                |                |               |                |                |                |               |                |                |                |                |               |                |               |              |
| Sugar and sweets                |                              |               |                |                |               |               |                |                |               |                |                |                |               |                |                |                |                |               |                |               |              |
| Cereals                         | Bread                        |               |                |                |               | +200%         |                |                | +200%         |                | +68%           | +200%          |               |                | 2 items, +200% | 1 item, +200%  | 1 item, +127%  |               |                |               |              |
|                                 | Breakfast cereals            |               | +200%          |                |               | +200%         |                |                | +200%         | +8%            |                | +200%          | +17%          |                |                | +200%          |                |               |                |               |              |
|                                 | Flour or starch              |               |                |                |               | -22%          |                |                |               |                |                |                | -16%          |                |                |                |                |               |                | -22%          |              |
|                                 | Grains and bran              |               |                |                |               | +200%         |                |                | +200%         |                |                | +200%          |               |                |                | +200%          |                |               |                |               |              |
|                                 | Pasta, bulgur, couscous etc. |               |                |                |               |               |                |                | +200%         |                |                | +200%          |               |                |                | +200%          |                |               |                |               |              |
|                                 | Rice                         |               | -75%           | -75%           |               | -75%          | -75%           |                | -75%          | -75%           |                | -67%           | -75%          |                | -75%           | -75%           | -75%           |               |                |               |              |

**Figure S2.** Summary of the RD for individual food items when minimizing TRD while applying constraints on nutritional adequacy, relative GHGE reductions, and additional constraints on the RD of individual food items (Model 3, CRD<sub>min</sub>).<sup>1</sup>No constraint on maximum allowed amount of carbon dioxide equivalents (CO<sub>2</sub>eq) per optimized food supply; GHGE, Greenhouse gas emissions; TRD, Total relative deviation; RD, Relative deviation of individual food items from baseline food supply after optimization, according to main food categories and food subcategories; CRD<sub>min</sub>, optimized for minimum total relative deviation while constraining the relative deviation of individual food items to a range between -75% and +200%.
